# Supplementary material for: Synthesis of vanadium based binary oxides with a yolk–shell structure and their derived electrocatalysts
Source: Royal Society of Chemistry journal article supplement (doi:10.1039/d1ta06243c), 2021-01-01
Supplement: d1ta06243c1.pdf [file d1ta06243c1.pdf]

## Supporting Information

### **Synthesis of vanadium based binary oxides with yolk-shell structure and its derived electrocatalysts**

Meiqin Shi,<sup>a</sup> Fei Peng,<sup>a</sup> Yu Qin,<sup>a</sup> Fengjiao Li,<sup>a</sup> Yuanhang Nie,<sup>a</sup> Jun Fang,<sup>a</sup> Xiaoling Lang,<sup>b\*</sup> Xinbiao Mao<sup>a\*</sup>

<sup>a</sup> College of Chemical Engineering, Zhejiang University of Technology, State Key Laboratory Breeding Base of

Green Chemistry-Synthesis Technology, Hangzhou 310032, Zhejiang, P. R. China

<sup>b</sup> College of Chemistry and Materials Science, Longyan University, Longyan, 364000, Fujian, P. R. China

\*Correspondence: ahshio@163.com, xbmao@zjut.edu.cn

## Experimental details

### Electrochemical measurements for HER

All the electrochemical measurements were operated with a CHI660D electrochemical workstation (CH Instruments, Inc. Shanghai) in a conventional three-electrode system consisting of a working electrode, a carbon rod counter electrode and a saturated silver chloride electrode and 0.5M H<sub>2</sub>SO<sub>4</sub> was used as the electrolyte. Working electrode was fabricated by dispersing 5mg of asprepared catalyst powder in 360  $\mu$ L ethanol/40  $\mu$ L Nafion (5 wt%). After the dispersion was ultrasonicated for 30 min, 10 mL of the catalyst suspension was dropped casted onto a glassy carbon electrode with 5mm in diameter and dried in the air. All potentials presented were referenced to a reversible hydrogen electrode (RHE):  $E(\text{RHE})=E(\text{Ag}/\text{AgCl}) + 0.059 \cdot \text{pH} + 0.199$  and all data referred were corrected by iR compensation. Linear sweep voltammetry (LSV) was recorded at a scan rate of 2mV·s<sup>-1</sup> to obtain the polarization curves. The long-term durability was tested by cyclic voltammetry (CV) scans from 0.1 to -0.3 V vs. RHE with a sweep rate of 100 mVs<sup>-1</sup>.

### Electrochemical measurements for ORR

All measurements were carried out with a CHI 660D electrochemical workstation (Chen-Hua, Shanghai, China) in a standard three-electrode cell. Working electrodes were prepared by mixing the 5mg catalyst with 180 $\mu$ L isopropanol and 20 $\mu$ L Nafion (5 wt %) by sonication 30 min to form a homogeneous ink. An amount of 4  $\mu$ L of catalyst ink was deposited onto the polished surface of a 3 mm RDE made of glassy carbon and dried in the air. A Pt foil (2 cm<sup>2</sup>) and a Hg/HgO electrode were used as the counter and reference electrode, respectively. All potentials referred to in this paper are converted to the pH-independent reversible hydrogen electrode (RHE):

$$E(\text{RHE}) = E(\text{Hg}/\text{HgO}) + 0.059 \cdot \text{pH} + 0.098$$

In the electrochemical measurements, all the electrodes were pretreated by cycling the potential between -0.7 and 0.3 V (vs Hg/HgO) at a sweep rate of 50 mV·s<sup>-1</sup> for 20 cycles to activate electrodes and remove the dissolved oxygen before the ORR activity tests in N<sub>2</sub>-saturated 0.1 M KOH solution until a stable cyclic voltammogram was recorded. Then, the electrolyte was saturated with oxygen by bubbling O<sub>2</sub> for 30 min prior to the ORR activity tests. A flow of O<sub>2</sub> was maintained over the electrolyte to ensure O<sub>2</sub> saturation during the recording of CV. Linear-sweep voltammetry (LSV) measurements were conducted under O<sub>2</sub>-saturated circumstance by sweeping the potential negatively from 0.3 V to -0.7 V at a scan rate of 5 mV·s<sup>-1</sup> with varying rotating speed from 2025 to 400 rpm. The stability tests of the catalysts were conducted by applying a cyclic potential sweep between -0.6 and 0 V in O<sub>2</sub>-saturated 0.1 M KOH solution, with a scan rate of 50 mV·s<sup>-1</sup>.

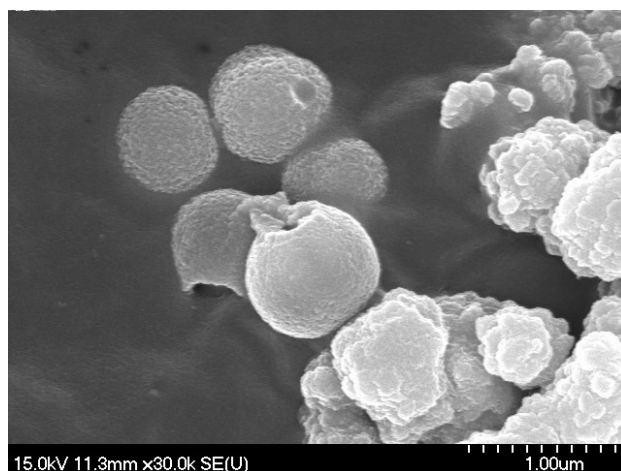

**Fig. S1** the WVO<sub>x</sub> prepared in absolute ethanol at 200 °C for 6 h.

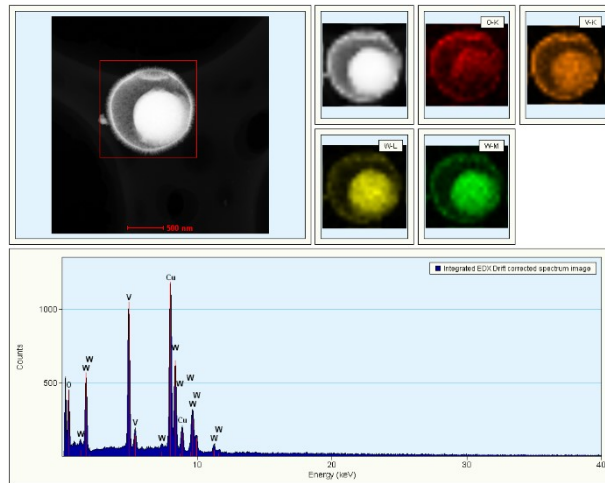

**Fig. S2** the EDS spectrum of  $WVO_x$  from the selected red square region and its corresponding mapping images of this region

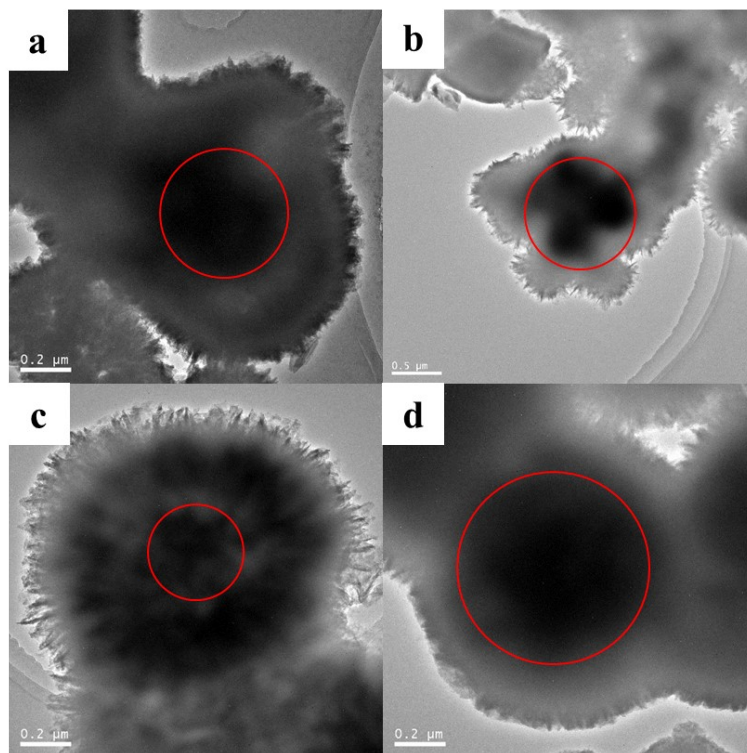

**Fig. S3** TEM images of  $\text{MnVO}_x$ (a),  $\text{FeVO}_x$ (b),  $\text{CoVO}_x$ (c), and  $\text{ZnVO}_x$ (d) prepared in absolute ethanol.

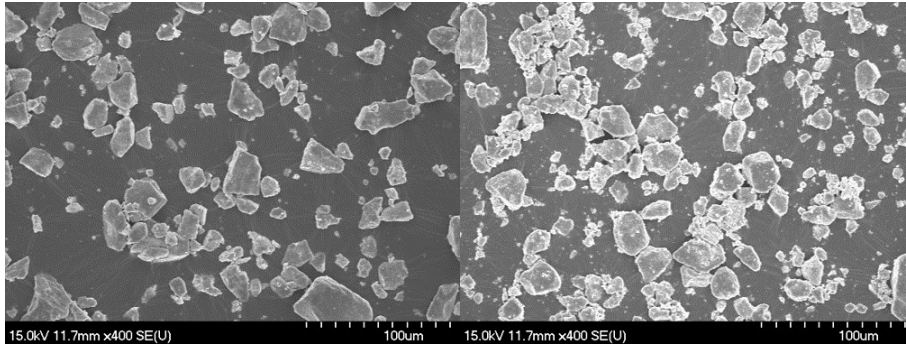

**Fig. S4** SEM images of NiVO<sub>x</sub> prepared in absolute ethanol.

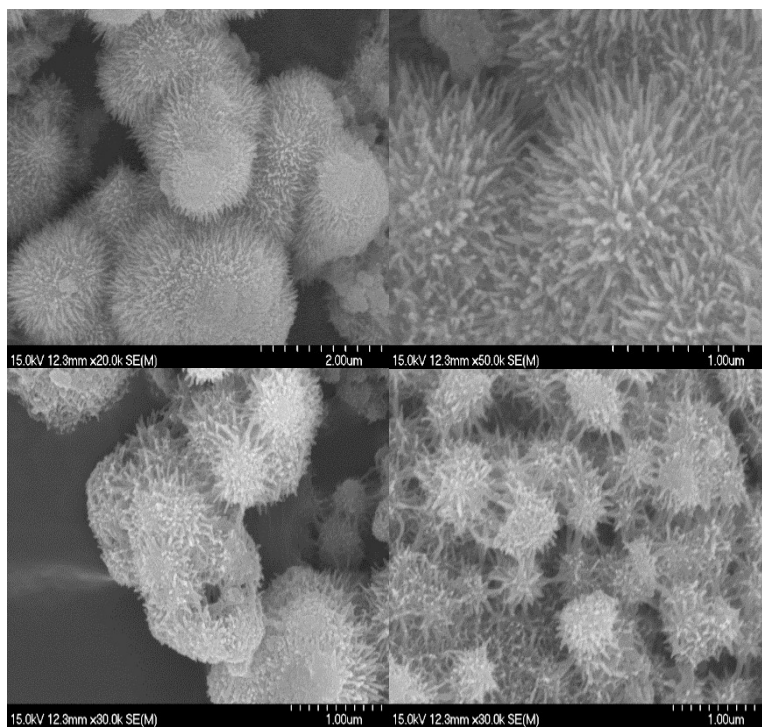

**Fig. S5** SEM images of  $WVO_x$  prepared in  $CH_3CH_2OH+H_2O$  ( $CH_3CH_2OH:H_2O=1:1$ )

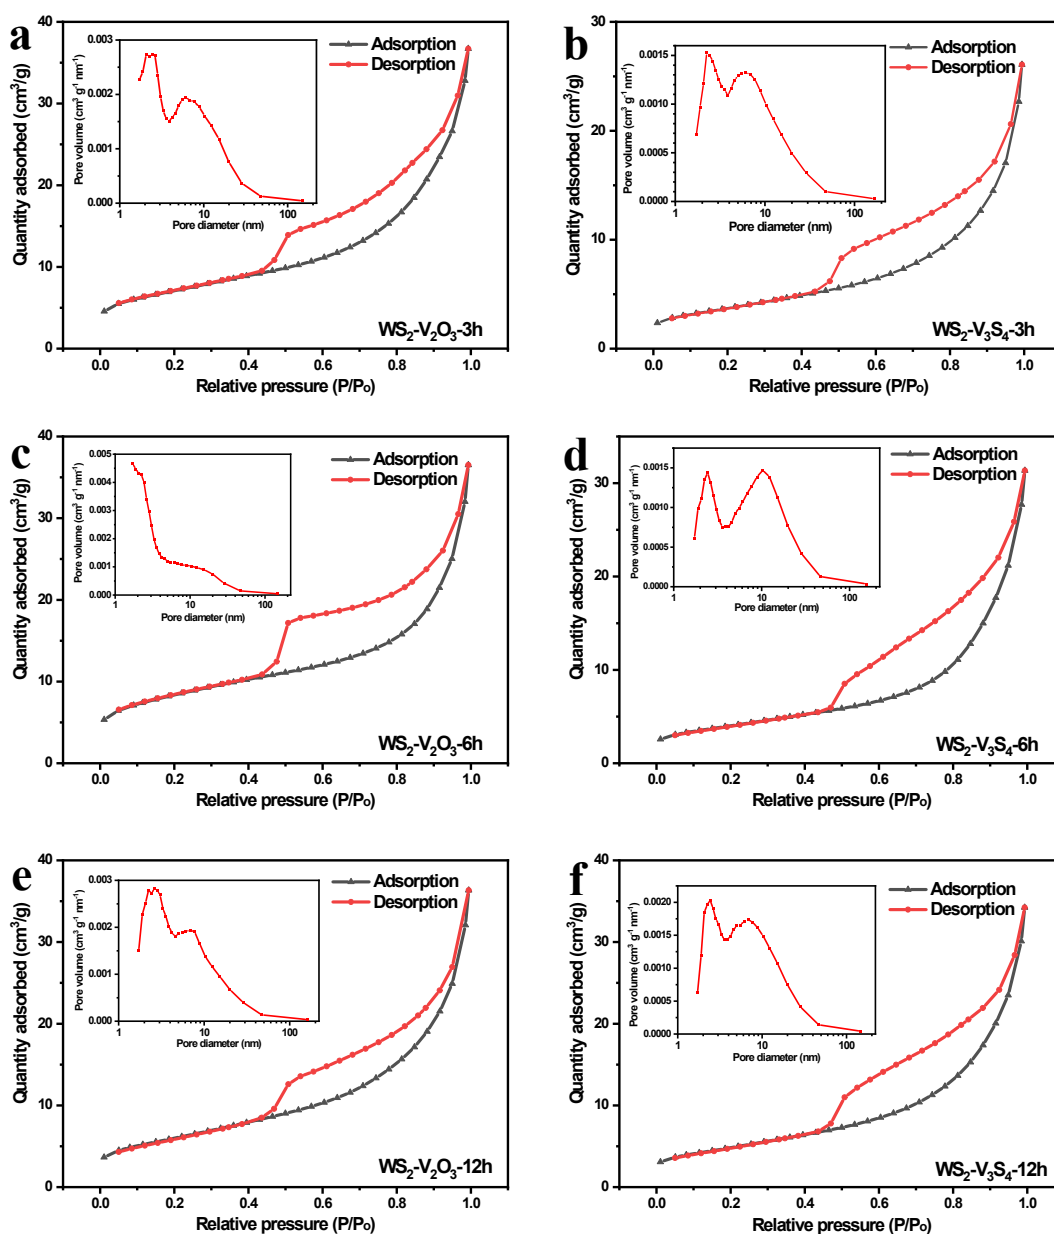

**Fig. S6**  $N_2$  adsorption-desorption, and pore size distribution plots of the synthesized catalysts. (a, c, e)  $WS_2-V_2O_3-3h$ ,  $WS_2-V_2O_3-6h$ ,  $WS_2-V_2O_3-12h$ ; (b, d, f)  $WS_2-V_3S_4-3h$ ,  $WS_2-V_3S_4-6h$ ,  $WS_2-V_3S_4-12h$



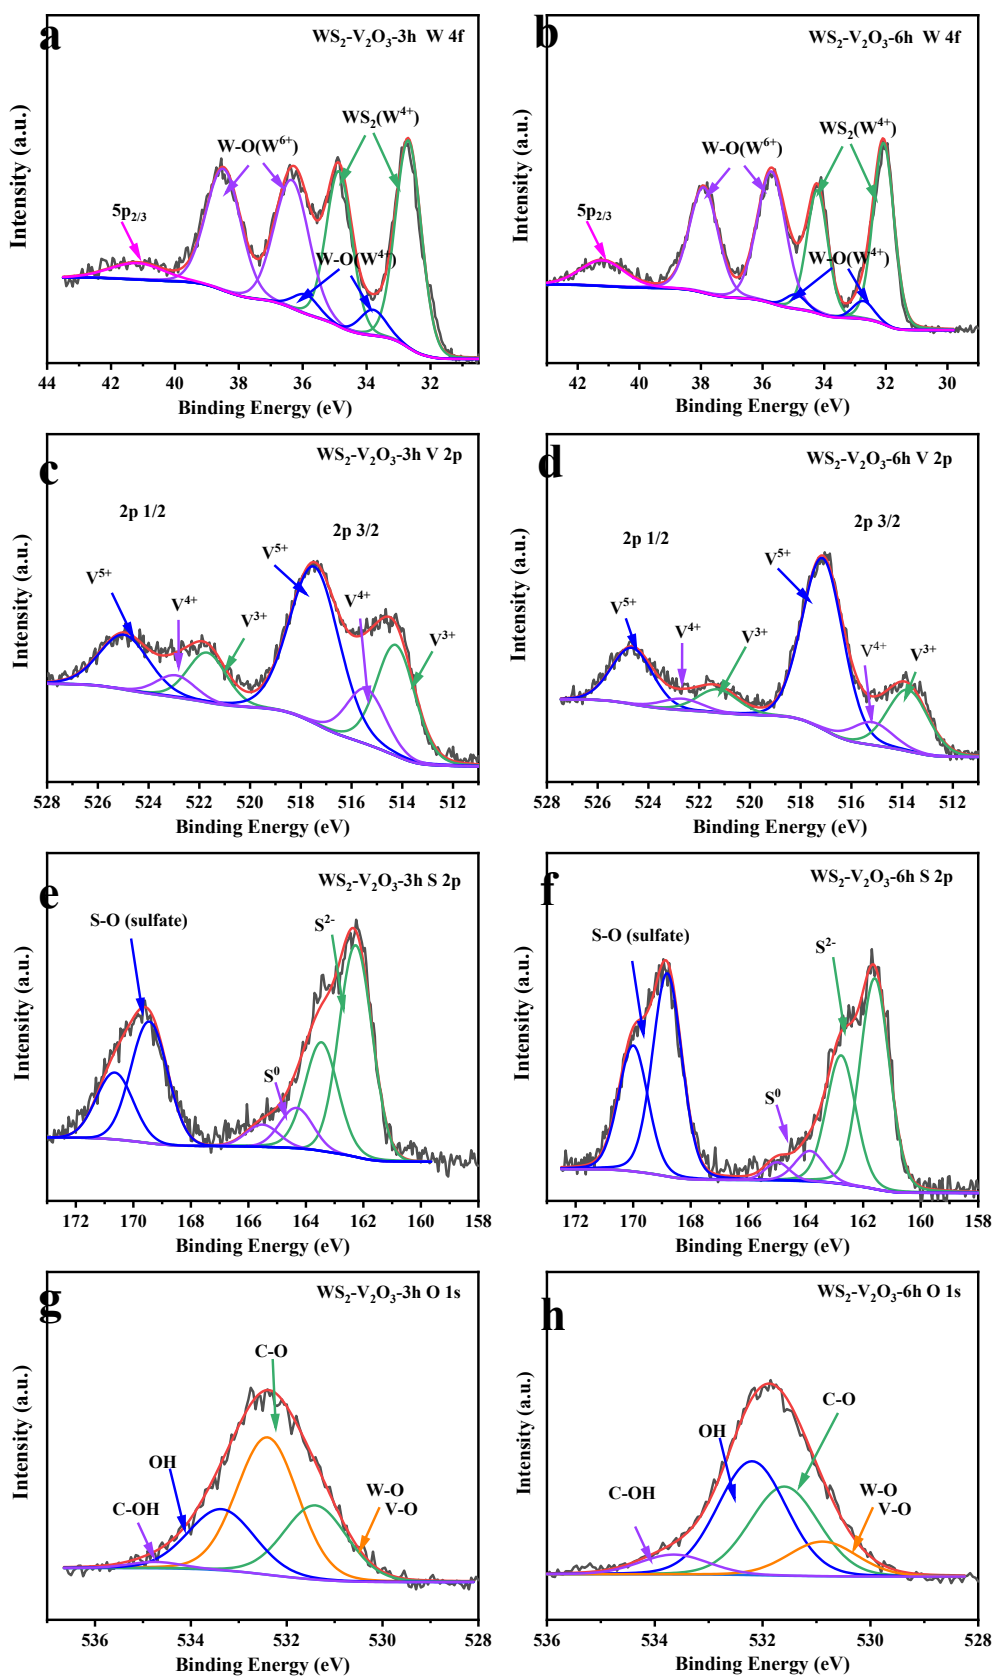

**Fig. S7** XPS spectra of  $\text{WS}_2\text{-V}_2\text{O}_5\text{-3h}$ : (a) W 4f, (c) V 2p, (e) S 2p, (g) O 1s. and  $\text{WS}_2\text{-V}_2\text{O}_5\text{-6h}$ : (b) W 4f, (d) V 2p, (f) S 2p, (h) O 1s.

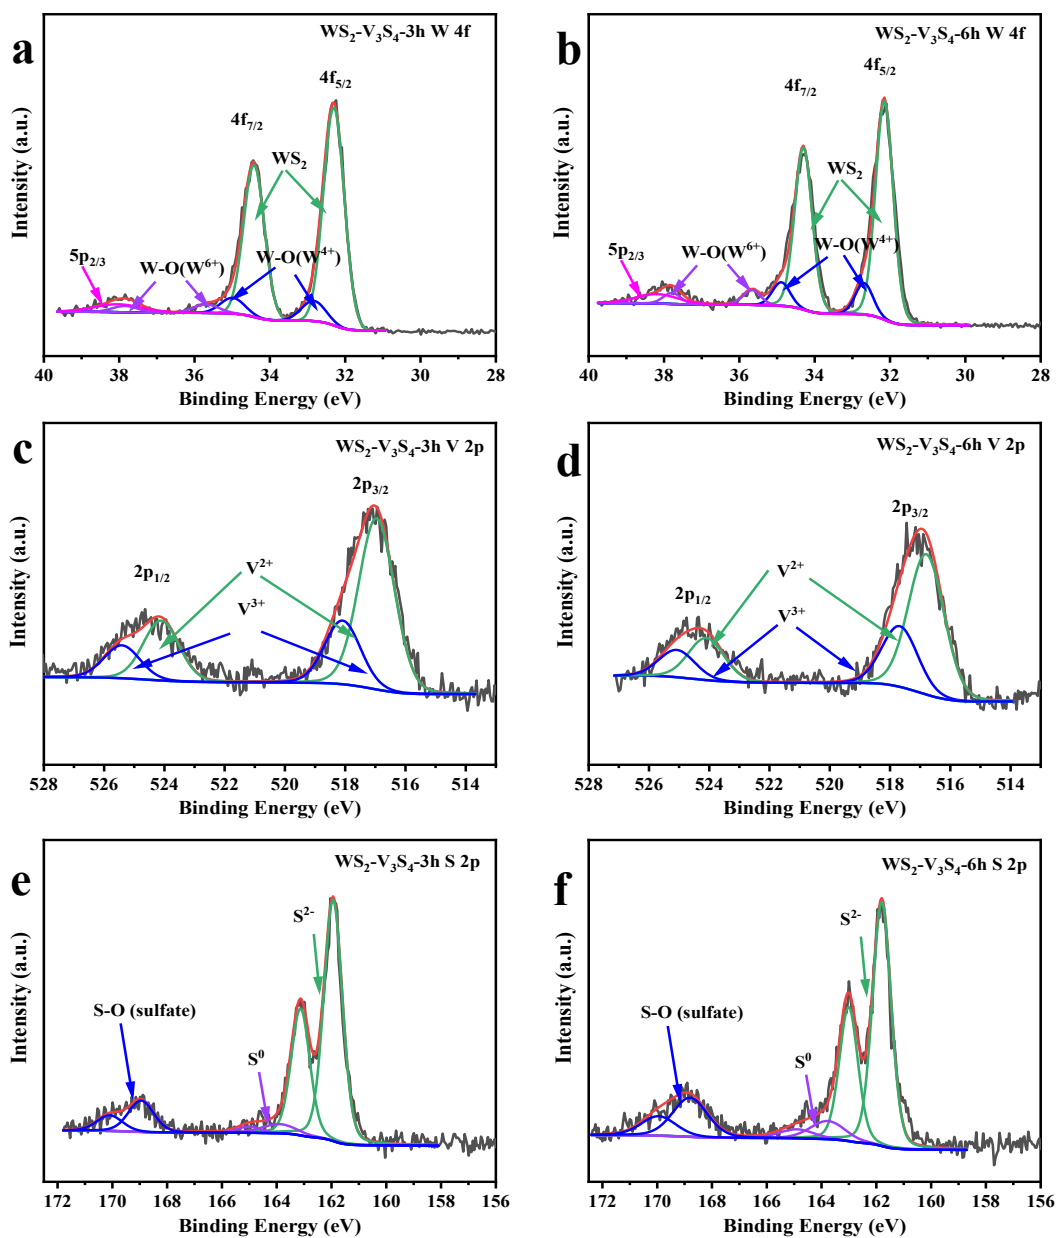

Fig. S8 XPS spectra of WS<sub>2</sub>-V<sub>3</sub>S<sub>4</sub>-3h: (a) W 4f, (c) V 2p, (e) S 2p, and WS<sub>2</sub>-V<sub>3</sub>S<sub>4</sub>-6h: (b) W 4f, (d) V 2p, (f) S 2p.

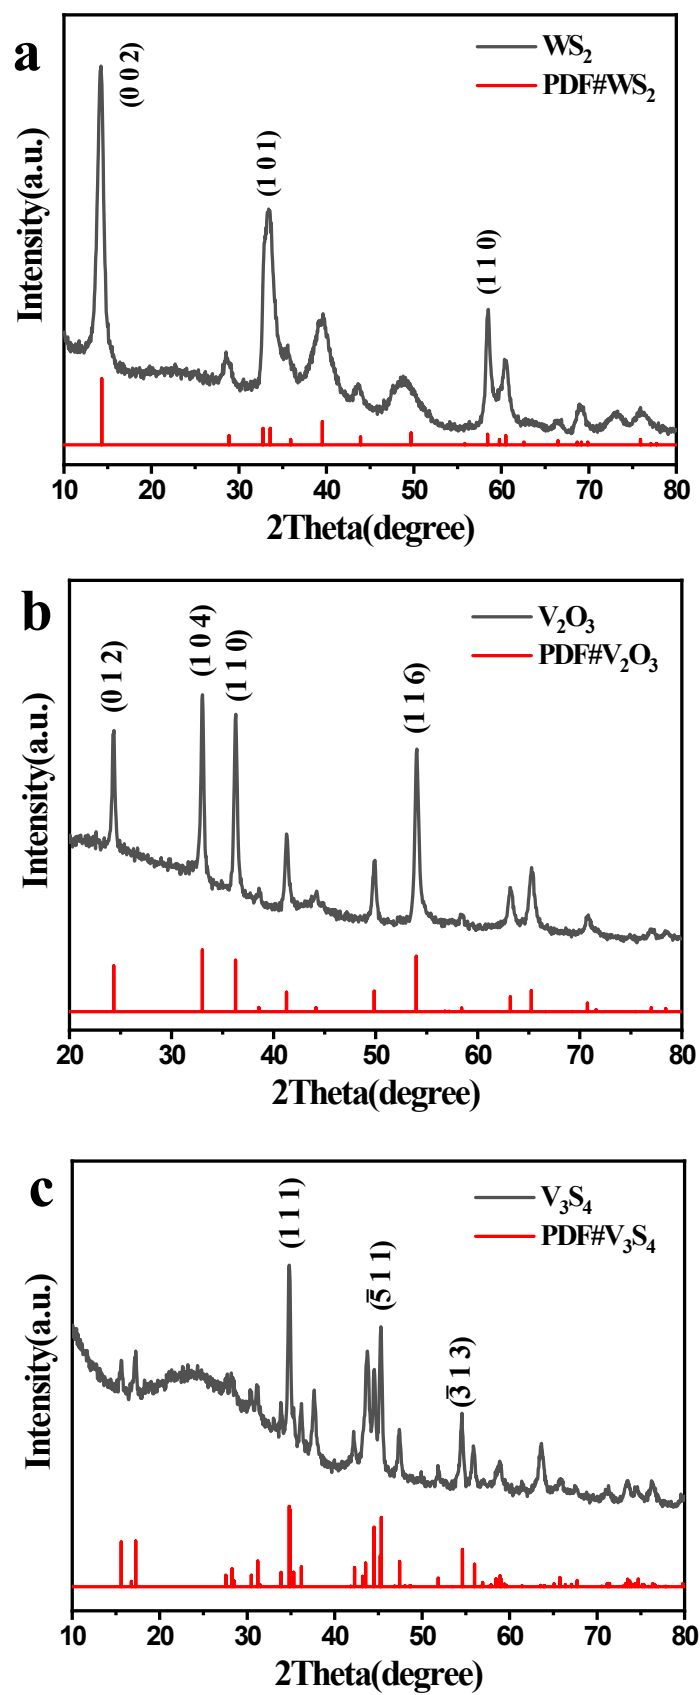

Fig. S9 XRD patterns of (a) $\text{WS}_2$ , (b) $\text{V}_2\text{O}_3$  and (c) $\text{V}_3\text{S}_4$ .

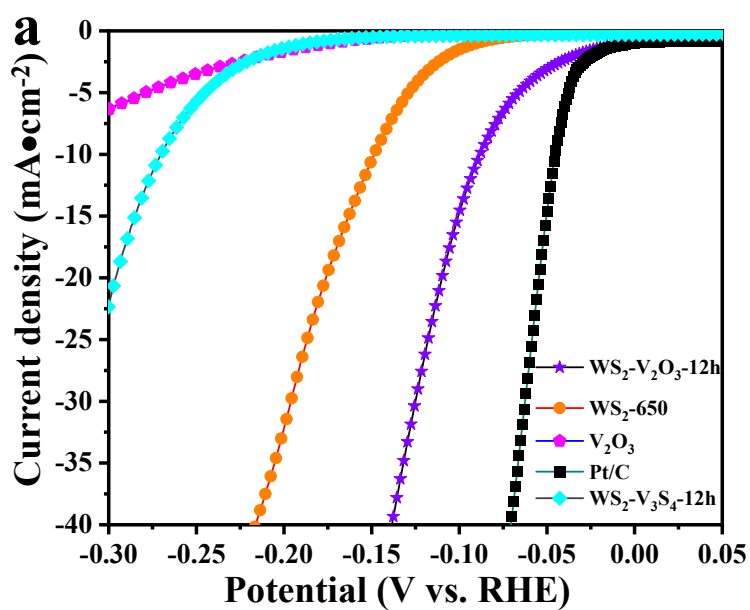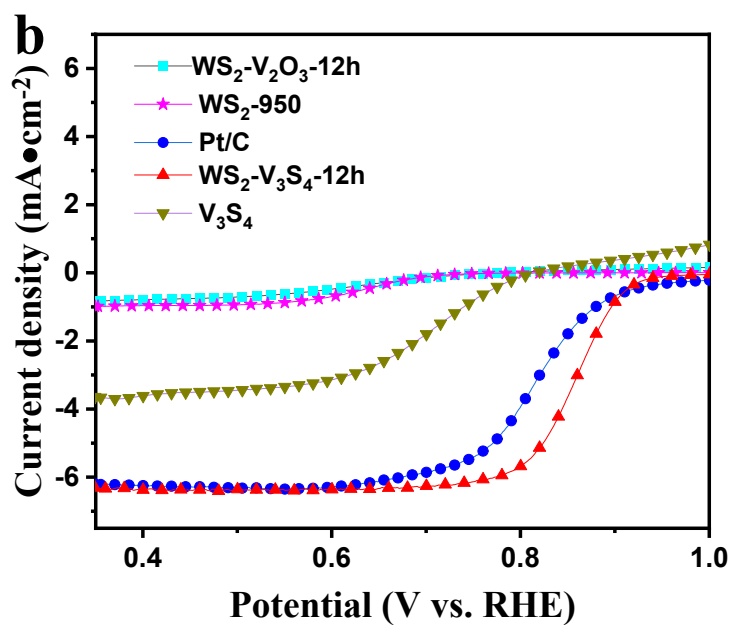

**Fig. S10** (a) Polarization curves obtained from WS<sub>2</sub>-V<sub>2</sub>O<sub>3</sub>-12h, WS<sub>2</sub>-650, V<sub>3</sub>S<sub>4</sub>, WS<sub>2</sub>-V<sub>3</sub>S<sub>4</sub>-12h and 20% Pt/C in 0.5 M H<sub>2</sub>SO<sub>4</sub> at a scanning rate of 2 mV s<sup>-1</sup>; All polarization curves are corrected for iR losses except for Pt. (b) Polarization curves of WS<sub>2</sub>-V<sub>2</sub>O<sub>3</sub>-12h, WS<sub>2</sub>-950, V<sub>3</sub>S<sub>4</sub>, WS<sub>2</sub>-V<sub>3</sub>S<sub>4</sub>-12h and 20% Pt/C in O<sub>2</sub>-saturated 0.1 M KOH solution with scan rate of 5 mV·s<sup>-1</sup>.

**Table S1.** Structural Parameters from Nitrogen Sorption Isotherms of the WS<sub>2</sub>-V<sub>2</sub>O<sub>3</sub> and WS<sub>2</sub>-V<sub>3</sub>S<sub>4</sub> samples which were obtained at different hydrothermal times (3h, 6h and 12h)

| <b>sample</b>                                        | <b>BJH pore size (nm)</b> | <b>pore volume (cm<sup>3</sup>/g)</b> | <b>BET surface area (m<sup>2</sup>/g)</b> |
|------------------------------------------------------|---------------------------|---------------------------------------|-------------------------------------------|
| <b>WS<sub>2</sub>-V<sub>2</sub>O<sub>3</sub>-3h</b>  | 10.45                     | 0.054                                 | 25.02                                     |
| <b>WS<sub>2</sub>-V<sub>2</sub>O<sub>3</sub>-6h</b>  | 9.71                      | 0.052                                 | 29.69                                     |
| <b>WS<sub>2</sub>-V<sub>2</sub>O<sub>3</sub>-12h</b> | 10.55                     | 0.055                                 | 21.69                                     |
| <b>WS<sub>2</sub>-V<sub>3</sub>S<sub>4</sub>-3h</b>  | 12.23                     | 0.040                                 | 13.37                                     |
| <b>WS<sub>2</sub>-V<sub>2</sub>S<sub>4</sub>-6h</b>  | 13.93                     | 0.048                                 | 14.39                                     |
| <b>WS<sub>2</sub>-V<sub>3</sub>S<sub>4</sub>-12h</b> | 11.98                     | 0.053                                 | 17.46                                     |
